# Supplementary material for: The expression and clinical significance of serine hydroxymethyltransferase2 in gastric cancer
Source: PeerJ. 2024 Jan 4;12:e16594. doi: 10.7717/peerj.16594 (PMC10771762; doi:10.7717/peerj.16594)
Supplement: Supplemental Information 2 [file peerj-12-16594-s002.xlsx]

## Sheet: Sheet1
Operative time	Survival status	Follow up time	SHMT2 expression	Survival time (months)	Gender	Age (year)	Pathological grade	Tumor size	Vessel invasion	Lymph node metastasis	T stage	N stage	M stage	TNM stage	P53 expression	Ki67 expression	VEGFR expression	CD33 expression	E-cadherin expression
2006.7	death	2009-06-25	high	36.00	female	67	Ⅲ	7×4×2.5cm	yes	no	T4	N3a	M0	3C	data loss	data loss	data loss	data loss	data loss
2006.7	death	2013/1/9	high	78.00	male	61	Ⅲ	4×3×1cm	no	yes	T3	N+	M0	3	high	low	low	high	high
2006.7	death	2008-07-21	low	24.00	male	52	Ⅲ	7×6×2cm	yes	yes	T3-4	N3a	M0	3	high	high	low	high	low
2006.7	alive	2015-07-31	low	108.00	male	54	Ⅱ-Ⅲ	3×2.5×0.5cm	no	yes	T3	N3a	M0	3B	data loss	data loss	data loss	data loss	data loss
2006.8	alive	2013-08-01	high	drop out	male	57	Ⅲ	6.5×4.5×1cm	yes	yes	T4b	N2	M0	3C	data loss	data loss	data loss	data loss	data loss
2006.8	death	2007-02-06	low	6.00	male	77	Ⅲ	7×4×1.5cm	yes	yes	T3	N3a	M1	4	high	high	high	high	high
2006.8	death	2006-11-28	high	3.00	male	59	Ⅱ-Ⅲ	7×5.5×1cm	yes	yes	T4b	N1	M1	4	high	high	high	high	low
2006.8	alive	2015-07-31	low	107.00	male	84	Ⅱ-Ⅲ	9×6.5×2cm	no	yes	T4a	N1	M0	3A	data loss	data loss	data loss	data loss	data loss
2006.8	death	2007-05-26	low	9.00	male	77	Ⅱ	3×2×0.5cm	yes	yes	T2	N2	M0	2B	high	high	low	low	low
2006.8	death	2006-10-02	high	2.00	female	69	Ⅲ-Ⅳ	2.5×2×0.4，1.2×1×0.3，6×2.5×1.5cm	no	yes	T3	N2	M0	3A	low	low	low	high	low
2006.8	alive	2015-07-31	low	107.00	female	62	Ⅱ	3×2.8×1cm	no	no	T1	N0	M0	1A	low	high	high	low	low
2006.8	death	2011-11-01	low	63.00	female	75	Ⅲ	1.8×1.5×1.2cm	no	yes	T2-3	N1	M0	2	low	low	low	low	low
2006.8	death	2006-09-15	low	1.00	male	71	Ⅲ	7.5×5×1cm	yes	yes	T3-4	N3a	M0	3	low	high	high	high	low
2006.8	death	2009-04-21	high	32.00	male	78	Ⅲ	3.5×2.5×0.9cm	no	no	T3	N0	M0	2	data loss	data loss	data loss	data loss	data loss
2006.9	death	2007-05-31	high	8.00	male	41	Ⅲ-Ⅳ	6.5×6×1cm	no	yes	T4a	N3a	M0	3C	high	low	low	low	low
2006.9	death	2012/11/23	low	74.00	female	67	Ⅲ	2.5×2.5×1，1.7×1.5×1cm	no	yes	T3	N3a	M0	3B	high	high	low	low	low
2006.9	death	2007-09-05	high	12.00	male	67	Ⅱ-Ⅲ	15×8×1.5cm	yes	yes	T3	N3a	M0	3B	high	high	high	high	high
2006.9	death	2008-07-16	high	22.00	male	60	Ⅲ	12×9×1.5cm	yes	yes	T3	N2	M0	3A	low	high	high	low	low
2006.9	death	2008-01-14	low	16.00	female	65	Ⅲ-Ⅳ	18×11×1cm	no	yes	T3	N2	M0	3A	low	low	low	low	low
2006.9	death	2011-04-27	low	55.00	male	53	Ⅱ	3.5×3.5×1.5cm	no	no	T4a	N0	M0	2B	high	high	low	low	high
2006.9	death	2008-08-06	high	23.00	female	73	Ⅲ	3×2×1cm	no	yes	T2	N3a	M0	3A	high	low	high	low	high
2006.9	death	2007-07-28	low	10.00	male	63	Ⅲ	3×2×1cm	yes	no	T3	N0	M0	3	data loss	data loss	data loss	data loss	data loss
2006.9	death	2009-02-03	high	29.00	male	72	Ⅲ	8×8×2cm	no	no	T3	N3a	M0	3	data loss	data loss	data loss	data loss	data loss
2006.12	death	2009-02-15	high	27.00	female	72	Ⅲ	12×7×2.5cm	yes	no	T3	N3b	M0	3	data loss	data loss	data loss	data loss	data loss
2006.12	death	2007-02-07	high	2.00	female	80	Ⅱ	6×4×2cm	no	no	T3	N0	M0	3	data loss	data loss	data loss	data loss	data loss
2007.1	death	2007-09-14	high	8.00	female	70	Ⅲ	5×4.8×0.2，2.5×2×0.8cm	no	yes	T3	N2	M0	3A	low	low	high	high	high
2007.1	death	2008-06-16	high	17.00	male	71	Ⅱ-Ⅲ	4.5×5×1.5cm	no	yes	T3	N1	M0	2B	high	low	high	high	high
2007.1	alive	2013-08-01	low	drop out	male	48	Ⅱ-Ⅲ	8.5×7×5cm	no	yes	T3	N2	M0	3A	low	high	high	high	high
2007.1	death	2008-06-12	high	17.00	male	72	Ⅲ	7×5×4cm	no	yes	T3	N3a	M0	3B	low	high	low	low	high
2007.1	alive	2015-07-31	low	102.00	male	70	Ⅲ	8×7×6cm	no	no	T2	N0	M0	1B	high	high	low	high	high
2007.1	death	2008-09-16	high	20.00	female	77	Ⅲ	6×6×5cm	no	yes	T3	N3a	M0	3B	low	high	high	low	low
2007.1	death	2007-05-25	low	4.00	male	72	Ⅱ	15×13×11cm	yes	yes	T3	N2	M0	3A	low	high	high	high	low
2007.2	alive	2013-08-01	high	drop out	male	79	Ⅲ-Ⅳ	10×10×8.2cm	no	no	T3	N0	M0	2A	low	high	low	high	high
2007.2	alive	2015-07-31	low	101.00	female	63	Ⅱ	3×2×1.5cm	no	no	T3	N0	M0	2A	low	high	high	low	low
2007.2	death	2008-12-05	low	22.00	male	65	Ⅱ-Ⅲ	1.2-2×1.5×1.5cm	no	yes	T3	N1	M0	2B	high	low	low	low	low
2007.2	death	2008-02-09	low	12.00	female	68	Ⅱ-Ⅲ	7×6×1.5cm	no	yes	T3	N3a	M0	3B	high	high	high	high	low
2007.2	alive	2015-07-31	high	101.00	male	78	Ⅱ	3.5×3×2cm	no	yes	T3	N2	M0	3A	high	high	high	high	high
2007.2	death	2008-07-10	high	17.00	female	57	Ⅱ-Ⅲ	7×7×4cm	no	yes	T3	N3a	M1	4	low	high	high	high	low
2007.2	death	2009-01-03	low	23.00	male	45	Ⅱ	4×3×1.5cm	no	yes	T3	N2	M1	4	low	low	high	low	low
2007.2	death	2008-07-22	low	17.00	female	50	Ⅲ	2.5×2×1cm	no	yes	T3	N2	M0	3A	high	high	low	high	high
2007.2	death	2012-07-09	high	65.00	male	65	Ⅲ	4×3.5×1cm	no	no	T2-3	N0	M0	2	high	high	high	high	high
2007.2	death	2008-07-11	high	17.00	male	71	Ⅱ-Ⅲ	3.5×3×0.4cm	no	yes	T3	N2	M1	4	low	high	low	high	high
2007.3	death	2014/4/27	low	85.00	female	75	Ⅲ	3×2.5×1.7cm	yes	yes	T3-4	N1	M0	2B	high	high	low	high	high
2007.3	death	2007-06-11	low	3.00	male	32	Ⅲ-Ⅳ	2.0×7×1.5cm	no	yes	T4a	N3a	M1	4	low	low	high	low	high
2007.3	alive	2013-08-01	high	drop out	male	58	Ⅱ-Ⅲ	8×7×6cm	no	no	T3	N0	M0	2A	low	high	low	high	high
2007.3	death	2007-12-10	high	9.00	female	73	Ⅲ-Ⅳ	14×10×7cm	no	yes	T3	N2	M0	3A	high	high	high	low	low
2007.3	alive	2013-08-01	high	drop out	female	62	Ⅲ-Ⅳ	12×8×1cm	no	no	T3	N0	M1	4	data loss	data loss	data loss	data loss	data loss
2007.3	death	2008/11/2	low	20.00	female	73	Ⅱ-Ⅲ	4×3×2cm	no	yes	T4a	N2	M0	3B	low	low	high	high	high
2007.3	alive	2015-07-31	high	100.00	female	58	Ⅱ	4×2×1cm	no	yes	T3	N1	M0	2B	high	high	high	high	low
2007.3	death	2008-06-14	high	15.00	female	73	Ⅲ	1-4×3×3cm	no	yes	T3	N2	M0	3A	low	high	high	high	high
2007.3	death	2009-01-15	high	22.00	male	52	Ⅲ	15×10×10cm 2×2×1.5cm	no	yes	T3	N3b	M0	3B	high	high	high	low	low
2007.3	death	2009-07-22	high	28.00	male	50	Ⅲ-Ⅳ	6×6×5cm	no	yes	T3	N3a	M0	3B	high	high	low	high	high
2007.3	death	2007-10-31	high	7.00	female	74	Ⅱ-Ⅲ	5×3×1cm	no	yes	T3	N3a	M1	4	high	low	high	high	high
2007.3	death	2007-06-06	low	3.00	female	67	Ⅲ	10×8×2cm	yes	yes	T4b	N3a	M0	3C	low	high	high	high	high
2007.3	alive	2015-07-31	low	100.00	male	53	Ⅲ	5.5×4.5×3.5cm	no	yes	T3	N2	M0	3A	low	low	low	low	high
2007.3	alive	2015-07-31	low	100.00	male	65	Ⅱ	0.5-1.2×1×0.5cm	no	yes	T3	N1	M0	2B	high	high	high	low	low
2007.3	death	2011-03-26	high	48.00	female	52	Ⅲ	5×4×1cm	no	yes	T3	N3a	M0	3B	low	low	low	high	high
2007.4	death	2010-06-20	high	38.00	male	47	Ⅲ	6×5×1.3cm	no	yes	T4a	N3a	M1	4	high	high	low	high	low
2007.4	alive	2015-07-31	low	99.00	male	62	Ⅱ-Ⅲ	3.5×2.5×0.5cm	no	yes	T2-3	N1	M0	2	high	high	high	high	high
2007.4	alive	2015-07-31	low	99.00	female	67	Ⅱ-Ⅲ	3.5×3×1cm	no	no	T3	N0	M0	2A	high	high	low	low	high
2007.4	alive	2015-07-31	high	99.00	female	59	Ⅱ-Ⅲ	3×2.1×0.4cm	no	yes	T1a	N1	M0	1B	low	low	low	low	high
2007.4	death	2011-09-16	high	53.00	female	74	Ⅱ	5×3×1cm	yes	yes	T3	N2	M0	3A	high	high	high	low	high
2007.4	alive	2015-07-31	high	99.00	female	58	Ⅲ	5×4×1cm	no	yes	T3	N3a	M0	3B	high	high	high	high	high
2007.4	death	2010-02-20	high	34.00	male	77	Ⅲ	6×2.5×1.5cm	no	yes	T3	N1	M0	2B	low	low	low	low	high
2007.4	alive	2015-07-31	high	99.00	female	57	Ⅱ	3×2×0.6cm	no	yes	T1b	N1	M0	1B	high	high	high	low	low
2007.4	death	2015-03-11	high	95.00	male	78	Ⅲ	6×3×2.5cm	no	yes	T3	N3a	M0	3B	low	high	low	low	low
2007.4	alive	2015-07-31	low	99.00	male	76	Ⅲ	7.5×7.5×2cm	no	yes	T3	N1	M0	2B	low	high	low	low	high
2007.4	alive	2015-07-31	high	99.00	male	56	Ⅱ	3×2×1cm	no	yes	T3	N2	M0	3A	high	high	high	high	high
2007.4	alive	2015-07-31	high	99.00	male	51	Ⅲ	7×4×1cm	no	yes	T3	N2	M0	3A	high	high	low	high	high
2007.4	death	2012-04-16	low	60.00	female	57	Ⅲ-Ⅳ	9×5×1cm	no	no	T3	N0	M0	2A	low	high	low	low	low
2007.4	alive	2015-07-31	high	99.00	male	52	Ⅲ	3×3×1cm	no	yes	T3	N2	M0	3A	high	high	high	high	high
2007.4	alive	2015-07-31	low	99.00	male	61	Ⅱ-Ⅲ	5×4×1cm	no	yes	T3	N2	M0	3A	low	high	low	high	low
2007.4	death	2013/1/8	low	69.00	female	67	Ⅲ-Ⅳ	3.5×3×1cm	no	no	T2-3	N0	M0	2	low	high	low	low	low
2007.4	death	2008-03-05	high	11.00	male	62	Ⅲ	5×5×1cm	no	yes	T3	N3a	M0	3B	high	high	high	low	low
2007.4	alive	2015-07-31	high	99.00	male	74	Ⅱ-Ⅲ	4×2×1cm	no	no	T4a	N0	M0	2B	high	high	low	high	high
2007.4	death	2010-08-13	high	40.00	male	62	Ⅲ	1.8×1.7×0.2cm	no	no	T1b	N0	M0	1A	high	high	high	low	low
2007.4	death	2008-09-11	low	17.00	male	62	Ⅲ	5.5×3.5×1.5cm	yes	yes	T4a	N3b	M0	3C	high	high	high	high	high
2007.4	death	2011-03-07	high	47.00	female	77	Ⅱ-Ⅲ	10×7.5×1cm	no	no	T3	N0	M0	2A	high	high	high	high	high
2007.4	alive	2015-07-31	low	99.00	male	61	Ⅲ	6.5×5.5×1cm	no	yes	T2	N3a	M0	3A	low	high	low	high	low
2006.7	death	2008-04-04	low	21.00	male	79	Ⅲ	4.5×3×1cm	no	yes	T4a	N+	M0	3	low	high	low	low	low
2006.8	death	2010-03-27	low	43.00	male	48	Ⅲ	2.5×2.3×1.5cm	no	no	T3	N0	M0	2A	low	low	low	low	high
2006.9	alive	2015-07-31	low	106.00	female	69	Ⅱ-Ⅲ	6×5.5×1cm	no	no	T3	N0	M0	2A	high	high	high	high	high
2006.9	alive	2015-07-31	low	106.00	male	65	Ⅱ-Ⅲ	3×2×1.5cm	no	no	T3	N0	M0	2A	low	low	low	high	high
2006.9	death	2007-07-13	high	10.00	male	79	Ⅲ	7.5×4.5×1.5cm	no	yes	T4a	N3a	M0	3C	high	high	high	high	high
2006.9	death	2008-04-28	high	19.00	female	53	Ⅱ	8×7×1.5cm	no	yes	T4a	N3a	M0	3C	high	high	high	high	low
2007.1	death	2008-09-17	low	20.00	male	53	Ⅲ	6×6×3cm	no	no	T3	N0	M0	2A	low	high	high	high	high
2007.1	death	2011-10-10	high	57.00	male	66	Ⅲ	15×13×11cm	no	yes	T3-4	N2	M0	3	high	high	high	high	high
2007.1	death	2011-03-15	high	50.00	male	75	Ⅲ	4×2×1.5cm	no	no	T3	N0	M0	2A	high	high	low	high	high
2007.2	death	2008-10-18	high	21.00	male	49	Ⅲ-Ⅳ	20×13×1cm	no	yes	T3	N3b	M0	3B	low	low	high	high	low
2007.2	death	2007-06-19	high	4.00	male	73	Ⅲ	14×10×7cm	no	yes	T4a	N3b	M0	3C	high	low	high	high	low
2007.3	death	2007-07-03	high	4.00	male	70	Ⅱ-Ⅲ	6×6×3cm	no	no	T2	N0	M0	1B	high	high	high	high	low
2007.3	alive	2015-07-31	low	100.00	male	63	Ⅲ	5×4×1cm	no	yes	T3	N3a	M0	3B	low	high	low	low	low
2007.3	alive	2015-07-31	low	100.00	male	59	Ⅲ	3×2×1cm	no	no	T2	N0	M0	1B	low	high	low	low	high
2007.3	death	2010-03-29	high	36.00	male	72	Ⅲ	5×2.5×1cm	no	no	T3	N0	M0	2A	high	low	low	low	low
2007.3	death	2008-11-17	low	20.00	female	54	Ⅲ	7×4×1.5cm	no	no	T3	N0	M0	2A	low	low	high	low	high
2007.3	death	2009-02-11	high	23.00	male	68	Ⅲ	3.5×2×2cm	yes	yes	T3	N2	M0	3A	low	high	low	high	low
2007.3	death	2009-04-26	low	25.00	female	55	Ⅲ	4×3×1cm	yes	yes	T3	N1	M0	2B	low	high	low	low	high
2007.3	death	2009-09-29	low	30.00	female	65	Ⅲ-Ⅳ	7×6×2cm	no	yes	T3	N3a	M0	3B	low	high	low	low	low
2007.4	death	2013-1-2	high	69.00	male	72	Ⅱ-Ⅲ	4.5×3.5×1.2cm	no	yes	T4a	N1	M0	3A	low	high	high	low	high
2007.4	death	2010-11-26	high	43.00	female	81	Ⅲ	2.8×2.5×1cm	no	no	T3	N0	M0	2A	high	high	high	low	low
2007.4	death	2007-07-10	high	3.00	female	81	Ⅲ	5×3×1.2cm	no	yes	T4a	N1	M0	3A	high	high	high	high	high
