# Supplementary material for: The expression and clinical significance of serine hydroxymethyltransferase2 in gastric cancer
Source: PeerJ. 2024 Jan 4;12:e16594. doi: 10.7717/peerj.16594 (PMC10771762; doi:10.7717/peerj.16594)
Supplement: Supplemental Information 3 [file peerj-12-16594-s003.xlsx]

## Sheet: HStmA180Su16 Array List
Arrangement diagram				This table introduces the tissue type and pathological type corresponding to each site in the tissue chip
Detailed information
Site	Tissue type	Pathological type
A01	cancer tissue	gastric adenocarcinoma
A02	para-carcinoma tissue	fundic glandular region mucosa
A03	cancer tissue	gastric adenocarcinoma
A04	para-carcinoma tissue	fundic glandular region mucosa
A05	cancer tissue	gastric adenocarcinoma
A06	para-carcinoma tissue	fundic glandular region mucosa
A07	cancer tissue	gastric adenocarcinoma
A08	para-carcinoma tissue	fundic glandular region mucosa
A09	cancer tissue	gastric adenocarcinoma
A10	para-carcinoma tissue	fundic glandular region mucosa
A11	cancer tissue	gastric adenocarcinoma
A12	para-carcinoma tissue	fundic glandular region mucosa
A13	cancer tissue	gastric adenocarcinoma
A14	para-carcinoma tissue	fundic glandular region mucosa
A15	cancer tissue	gastric adenocarcinoma
A16	para-carcinoma tissue	fundic glandular region mucosa
A17	cancer tissue	gastric adenocarcinoma
A18	para-carcinoma tissue	fundic glandular region mucosa
B01	cancer tissue	gastric adenocarcinoma
B02	para-carcinoma tissue	fundic glandular region mucosa
B03	cancer tissue	gastric adenocarcinoma
B04	para-carcinoma tissue	fundic glandular region mucosa
B05	cancer tissue	gastric adenocarcinoma
B06	para-carcinoma tissue	fundic glandular region mucosa
B07	cancer tissue	gastric adenocarcinoma
B08	para-carcinoma tissue	fundic glandular region mucosa
B09	cancer tissue	gastric adenocarcinoma
B10	para-carcinoma tissue	fundic glandular region mucosa
B11	cancer tissue	gastric adenocarcinoma
B12	para-carcinoma tissue	fundic glandular region mucosa
B13	cancer tissue	gastric adenocarcinoma
B14	para-carcinoma tissue	fundic glandular region mucosa
B15	cancer tissue	gastric adenocarcinoma
B16	para-carcinoma tissue	fundic glandular region mucosa
B17	cancer tissue	gastric adenocarcinoma
B18	para-carcinoma tissue	fundic glandular region mucosa
C01	cancer tissue	gastric adenocarcinoma
C02	para-carcinoma tissue	fundic glandular region mucosa
C03	cancer tissue	gastric adenocarcinoma
C04	para-carcinoma tissue	fundic glandular region mucosa
C05	cancer tissue	gastric adenocarcinoma
C06	para-carcinoma tissue	fundic glandular region mucosa
C07	cancer tissue	gastric adenocarcinoma
C08	para-carcinoma tissue	fundic glandular region mucosa
C09	cancer tissue	gastric adenocarcinoma
C10	para-carcinoma tissue	fundic glandular region mucosa
C11	cancer tissue	gastric adenocarcinoma
C12	para-carcinoma tissue	fundic glandular region mucosa
C13	cancer tissue	gastric adenocarcinoma
C14	para-carcinoma tissue	fundic glandular region mucosa
C15	cancer tissue	gastric adenocarcinoma
C16	para-carcinoma tissue	fundic glandular region mucosa
C17	cancer tissue	gastric adenocarcinoma
C18	para-carcinoma tissue	fundic glandular region mucosa
D01	cancer tissue	gastric adenocarcinoma
D02	para-carcinoma tissue	fundic glandular region mucosa
D03	cancer tissue	gastric adenocarcinoma
D04	para-carcinoma tissue	fundic glandular region mucosa
D05	cancer tissue	gastric adenocarcinoma
D06	para-carcinoma tissue	fundic glandular region mucosa
D07	cancer tissue	gastric adenocarcinoma
D08	para-carcinoma tissue	fundic glandular region mucosa
D09	cancer tissue	gastric adenocarcinoma
D10	para-carcinoma tissue	fundic glandular region mucosa
D11	cancer tissue	gastric adenocarcinoma
D12	para-carcinoma tissue	fundic glandular region mucosa
D13	cancer tissue	gastric adenocarcinoma
D14	para-carcinoma tissue	fundic glandular region mucosa
D15	cancer tissue	gastric adenocarcinoma
D16	para-carcinoma tissue	fundic glandular region mucosa
D17	cancer tissue	gastric adenocarcinoma
D18	para-carcinoma tissue	fundic glandular region mucosa
E01	cancer tissue	gastric adenocarcinoma
E02	para-carcinoma tissue	fundic glandular region mucosa
E03	cancer tissue	gastric adenocarcinoma
E04	para-carcinoma tissue	fundic glandular region mucosa
E05	cancer tissue	gastric adenocarcinoma
E06	para-carcinoma tissue	fundic glandular region mucosa
E07	cancer tissue	gastric adenocarcinoma
E08	para-carcinoma tissue	fundic glandular region mucosa
E09	cancer tissue	gastric adenocarcinoma
E10	para-carcinoma tissue	fundic glandular region mucosa
E11	cancer tissue	gastric adenocarcinoma
E12	para-carcinoma tissue	fundic glandular region mucosa
E13	cancer tissue	gastric adenocarcinoma
E14	para-carcinoma tissue	fundic glandular region mucosa
E15	cancer tissue	gastric adenocarcinoma
E16	para-carcinoma tissue	fundic glandular region mucosa
E17	cancer tissue	gastric adenocarcinoma
E18	para-carcinoma tissue	fundic glandular region mucosa
F01	cancer tissue	gastric adenocarcinoma
F02	para-carcinoma tissue	fundic glandular region mucosa
F03	cancer tissue	gastric adenocarcinoma
F04	para-carcinoma tissue	fundic glandular region mucosa
F05	cancer tissue	gastric adenocarcinoma
F06	para-carcinoma tissue	fundic glandular region mucosa
F07	cancer tissue	gastric adenocarcinoma
F08	para-carcinoma tissue	fundic glandular region mucosa
F09	cancer tissue	gastric adenocarcinoma
F10	para-carcinoma tissue	fundic glandular region mucosa
F11	cancer tissue	gastric adenocarcinoma
F12	para-carcinoma tissue	fundic glandular region mucosa
F13	cancer tissue	gastric adenocarcinoma
F14	para-carcinoma tissue	fundic glandular region mucosa
F15	cancer tissue	gastric adenocarcinoma
F16	para-carcinoma tissue	fundic glandular region mucosa
F17	cancer tissue	gastric adenocarcinoma
F18	para-carcinoma tissue	fundic glandular region mucosa
G01	cancer tissue	gastric adenocarcinoma
G02	para-carcinoma tissue	fundic glandular region mucosa
G03	cancer tissue	gastric adenocarcinoma
G04	para-carcinoma tissue	fundic glandular region mucosa
G05	cancer tissue	gastric adenocarcinoma
G06	para-carcinoma tissue	fundic glandular region mucosa
G07	cancer tissue	gastric adenocarcinoma
G08	para-carcinoma tissue	fundic glandular region mucosa
G09	cancer tissue	gastric adenocarcinoma
G10	para-carcinoma tissue	fundic glandular region mucosa
G11	cancer tissue	gastric adenocarcinoma
G12	para-carcinoma tissue	fundic glandular region mucosa
G13	cancer tissue	gastric adenocarcinoma
G14	para-carcinoma tissue	fundic glandular region mucosa
G15	cancer tissue	gastric adenocarcinoma
G16	para-carcinoma tissue	fundic glandular region mucosa
G17	cancer tissue	gastric adenocarcinoma
G18	para-carcinoma tissue	fundic glandular region mucosa
H01	cancer tissue	gastric adenocarcinoma
H02	para-carcinoma tissue	fundic glandular region mucosa
H03	cancer tissue	gastric adenocarcinoma
H04	para-carcinoma tissue	fundic glandular region mucosa
H05	cancer tissue	gastric adenocarcinoma
H06	para-carcinoma tissue	fundic glandular region mucosa
H07	cancer tissue	gastric adenocarcinoma
H08	para-carcinoma tissue	fundic glandular region mucosa
H09	cancer tissue	gastric adenocarcinoma
H10	para-carcinoma tissue	fundic glandular region mucosa
H11	cancer tissue	gastric adenocarcinoma
H12	para-carcinoma tissue	fundic glandular region mucosa
H13	cancer tissue	gastric adenocarcinoma
H14	para-carcinoma tissue	fundic glandular region mucosa
H15	cancer tissue	gastric adenocarcinoma
H16	para-carcinoma tissue	fundic glandular region mucosa
H17	cancer tissue	gastric adenocarcinoma
H18	para-carcinoma tissue	fundic glandular region mucosa
I01	cancer tissue	gastric adenocarcinoma
I02	para-carcinoma tissue	fundic glandular region mucosa
I03	cancer tissue	gastric adenocarcinoma
I04	para-carcinoma tissue	fundic glandular region mucosa
I05	cancer tissue	gastric adenocarcinoma
I06	para-carcinoma tissue	fundic glandular region mucosa
I07	cancer tissue	gastric adenocarcinoma
I08	para-carcinoma tissue	fundic glandular region mucosa
I09	cancer tissue	gastric adenocarcinoma
I10	para-carcinoma tissue	fundic glandular region mucosa
I11	cancer tissue	gastric adenocarcinoma
I12	para-carcinoma tissue	fundic glandular region mucosa
I13	cancer tissue	gastric adenocarcinoma
I14	para-carcinoma tissue	fundic glandular region mucosa
I15	cancer tissue	gastric adenocarcinoma
I16	cancer tissue	gastric adenocarcinoma
I17	cancer tissue	gastric adenocarcinoma
I18	cancer tissue	gastric adenocarcinoma
J01	cancer tissue	gastric adenocarcinoma
J02	cancer tissue	gastric adenocarcinoma
J03	cancer tissue	gastric adenocarcinoma
J04	cancer tissue	gastric adenocarcinoma
J05	cancer tissue	gastric adenocarcinoma
J06	cancer tissue	gastric adenocarcinoma
J07	cancer tissue	gastric adenocarcinoma
J08	cancer tissue	gastric adenocarcinoma
J09	cancer tissue	gastric adenocarcinoma
J10	cancer tissue	gastric adenocarcinoma
J11	cancer tissue	gastric adenocarcinoma
J12	cancer tissue	gastric adenocarcinoma
J13	cancer tissue	gastric adenocarcinoma
J14	cancer tissue	gastric adenocarcinoma
J15	cancer tissue	gastric adenocarcinoma
J16	cancer tissue	gastric adenocarcinoma
J17	cancer tissue	gastric adenocarcinoma
J18	cancer tissue	gastric adenocarcinoma
K01	anchor point
